# Supplementary material
Source: publisher figshare collection journal article supplement (https://acs.figshare.com/ndownloader/files/11420213)
Supplement: Supplementary file 1 [file 11420213]

## Supporting Information

### Low-Energy Structures and Electronic Properties of Large-Sized $\text{Si}_N$ Clusters ( $N = 60, 80, 100, 120, 150, 170$ )

Di Wu,<sup>†,‡</sup> Xue Wu,<sup>†</sup> Xiaoqing Liang,<sup>†</sup> Ruili Shi,<sup>†</sup> Zhe Li,<sup>†</sup> Xiaoming Huang,<sup>§</sup> Jijun Zhao<sup>\*,†</sup>

<sup>†</sup>Key Laboratory of Materials Modification by Laser, Ion and Electron Beams (Dalian University of Technology), Ministry of Education, Dalian 116024, China

<sup>‡</sup>School of Science, Shenyang Aerospace University, Shenyang 110136, China

<sup>§</sup>School of Ocean Science and Technology, Dalian University of Technology, Panjin 124221, China

---

\* Corresponding author. E-mail : zhaojj@dlut.edu.cn

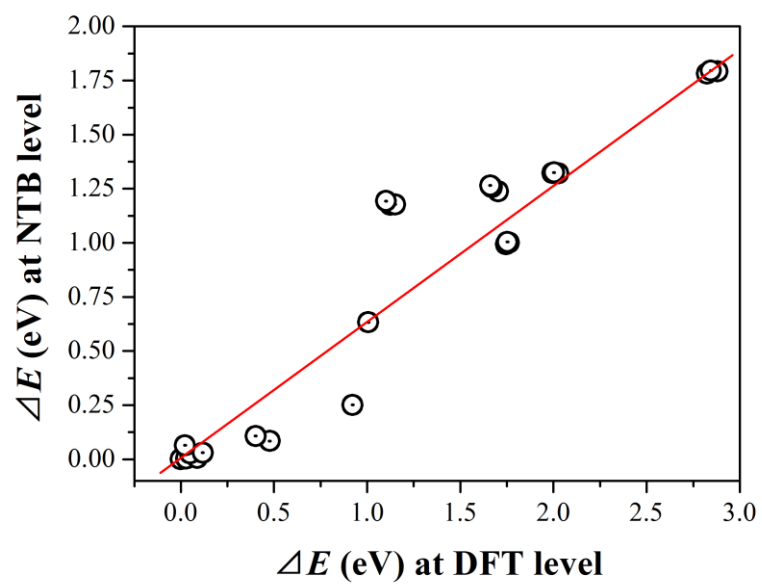

**Figure S1.** Relative energies  $\Delta E$  from NTB model versus  $\Delta E$  from DFT single-point energies for 25 selected isomers of  $\text{Si}_{60}$ .

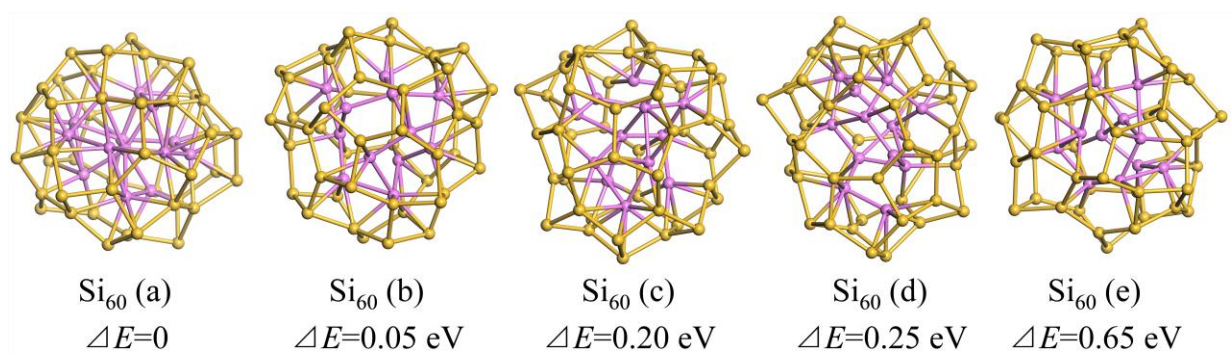

**Figure S2.** Structures and relative energies ( $\Delta E$ ) for isomers of  $\text{Si}_{60}$  from five independent BH search. The core atoms are highlighted in pink color and the atoms on outer cage are in yellow.

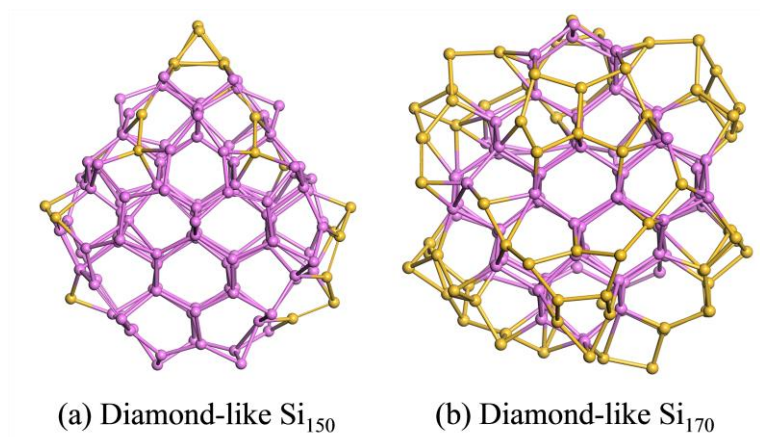

**Figure S3.** Low-energy diamond-like structures of Si<sub>150</sub> and Si<sub>170</sub> clusters. The majority atoms in diamond-like core structure are in pink, while the rest of surface atoms are in yellow.
